# Supplementary material for: Consumption of Substances in Nightlife Settings: A Qualitative Approach in Young Andalusians (Spain)
Source: MDPI journal article supplement (doi:10.3390/ijerph17165646), 2020-08-05
Supplement: s1 [file s1]

**Table S1:** Consolidated criteria for reporting qualitative studies (COREQ): 32-item checklist.

| No                                             | Item | Guide questions/description | Response |
|------------------------------------------------|------|-----------------------------|----------|
| <b>Domain 1: Research team and reflexivity</b> |      |                             |          |

Personal Characteristics

|    |                         |                                                         |                                                                                                                      |
|----|-------------------------|---------------------------------------------------------|----------------------------------------------------------------------------------------------------------------------|
| 1. | Interviewer/facilitator | Which author/s conducted the interview or focus group?  | All the interviews were conducted by the four authors (MAGC, LTC, RDC).                                              |
| 2. | Credentials             | What were the researcher's credentials?<br>E.g. PhD, MD | RDC and MAGC were PhD. LTC were MScN.                                                                                |
| 3. | Occupation              | What was their occupation at the time of the study?     | All authors were research professor.                                                                                 |
| 4. | Gender                  | Was the researcher male or female?                      | All authors were females.                                                                                            |
| 5. | Experience and training | What experience or training did the researcher have?    | All researchers had experience in carrying out qualitative research and the have been trained to conduct interviews. |

Relationship with participants

|    |                                          |                                                                                                                                           |                                                                   |
|----|------------------------------------------|-------------------------------------------------------------------------------------------------------------------------------------------|-------------------------------------------------------------------|
| 6. | Relationship established                 | Was a relationship established prior to study commencement?                                                                               | No, there wasn't.                                                 |
| 7. | Participant knowledge of the interviewer | What did the participants know about the researcher? e.g. personal goals, reasons for doing the research                                  | Name, occupation, reasons for doing the research.                 |
| 8. | Interviewer characteristics              | What characteristics were reported about the interviewer/facilitator? e.g. Bias, assumptions, reasons and interests in the research topic | Name, occupation, contact method, reasons for doing the research. |

|                               |  |  |  |
|-------------------------------|--|--|--|
| <b>Domain 2: Study design</b> |  |  |  |
|-------------------------------|--|--|--|

Theoretical framework

|  |  |  |  |
|--|--|--|--|
|  |  |  |  |
|--|--|--|--|

|    |                                       |                                                                                                                                                          |                                                                                   |
|----|---------------------------------------|----------------------------------------------------------------------------------------------------------------------------------------------------------|-----------------------------------------------------------------------------------|
| 9. | Methodological orientation and Theory | What methodological orientation was stated to underpin the study? e.g. grounded theory, discourse analysis, ethnography, phenomenology, content analysis | Phenomenological and ethnographic approach with a discourse and content analysis. |
|----|---------------------------------------|----------------------------------------------------------------------------------------------------------------------------------------------------------|-----------------------------------------------------------------------------------|

#### Participant selection

|     |                    |                                                                                    |                                                                                                              |
|-----|--------------------|------------------------------------------------------------------------------------|--------------------------------------------------------------------------------------------------------------|
| 10. | Sampling           | How were participants selected? e.g. purposive, convenience, consecutive, snowball | Convenience sampling.                                                                                        |
| 11. | Method of approach | How were participants approached? e.g. face-to-face, telephone, mail, email        | Face to face.                                                                                                |
| 12. | Sample size        | How many participants were in the study?                                           | 45 Andalusian girls and boys aged between 16 and 22 and 13 social agents (health and teaching professionals) |
| 13. | Non-participation  | How many people refused to participate or dropped out? Reasons?                    | 2 for personal reasons.                                                                                      |

#### Setting

|     |                              |                                                                                   |                                                                                                                                                                                      |
|-----|------------------------------|-----------------------------------------------------------------------------------|--------------------------------------------------------------------------------------------------------------------------------------------------------------------------------------|
| 14. | Setting of data collection   | Where was the data collected? e.g. home, clinic, workplace                        | The interviews were carried out in different places.                                                                                                                                 |
| 15. | Presence of non-participants | Was anyone else present besides the participants and researchers?                 | No, it wasn't.                                                                                                                                                                       |
| 16. | Description of sample        | What are the important characteristics of the sample? e.g. demographic data, date | Spanish young people who had consumed drugs and alcohol and social agents, they had to have permanent and direct contact with young consumers in the fields of health and education. |

#### Data collection

|     |                        |                                                                               |                                |
|-----|------------------------|-------------------------------------------------------------------------------|--------------------------------|
| 17. | Interview guide        | Were questions, prompts, guides provided by the authors? Was it pilot tested? | Yes, they were. / Yes, it was. |
| 18. | Repeat interviews      | Were repeat interviews carried out? If yes, how many?                         | No, they weren't.              |
| 19. | Audio/visual recording | Did the research use audio or visual recording to collect the data?           | Audio recording.               |

|     |                 |                                                                         |                               |
|-----|-----------------|-------------------------------------------------------------------------|-------------------------------|
| 20. | Field notes     | Were field notes made during and/or after the interview or focus group? | Yes, they were (field notes). |
| 21. | Duration        | What was the duration of the inter views or focus group?                | 60 minutes.                   |
| 22. | Data saturation | Was data saturation discussed?                                          | Yes, it was.                  |

|                                       |                      |                                                                          |                             |
|---------------------------------------|----------------------|--------------------------------------------------------------------------|-----------------------------|
| 23.                                   | Transcripts returned | Were transcripts returned to participants for comment and/or correction? | Reviewed by 2 participants. |
| <b>Doman 3: Analysis and findings</b> |                      |                                                                          |                             |

#### Data analysis

|     |                                |                                                             |                                         |
|-----|--------------------------------|-------------------------------------------------------------|-----------------------------------------|
| 24. | Number of data coders          | How many data coders coded the data?                        | Two (LTC and RDC).                      |
| 25. | Description of the coding tree | Did authors provide a description of the coding tree?       | Yes, we did.                            |
| 26. | Derivation of themes           | Were themes identified in advance or derived from the data? | Themes were derived using both methods. |
| 27. | Software                       | What software, if applicable, was used to manage the data?  | NUDIST Nvivo 12.                        |
| 28. | Participant checking           | Did participants provide feedback on the findings?          | Reviewed by 2 informants.               |

#### Reporting

|     |                              |                                                                                                                                 |                                    |
|-----|------------------------------|---------------------------------------------------------------------------------------------------------------------------------|------------------------------------|
| 29. | Quotations presented         | Were participant quotations presented to illustrate the themes/findings? Was each quotation identified? e.g. participant number | Yes, there were. / Yes, there was. |
| 30. | Data and findings consistent | Was there consistency between the data presented and the findings?                                                              | Yes, there was.                    |
| 31. | Clarity of major themes      | Were major themes clearly presented in the findings?                                                                            | Yes, they were.                    |
| 32. | Clarity of minor themes      | Is there a description of diverse cases or discussion of minor themes?                                                          | Yes, there is.                     |

Developed from: Tong, A. Sainsbury, P., and Craig, J. 2007. Consolidated criteria for reporting qualitative research (COREQ): A 32- ítem checklist for interviews and focus group. Int. J. Qual. Health Care 19: 349-357.
